# Supplementary material
Source: Copernicus journal article supplement (doi:10.5194/angeo-44-489-2026)

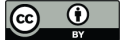

*Supplement of*

## **Equatorial ionospheric plasma bubbles during intense geomagnetic storms of Solar Cycle 25**

**Nadia Imtiaz et al.**

*Correspondence to:* Nadia Imtiaz ([nhussain@ualberta.ca](mailto:nhussain@ualberta.ca))

The copyright of individual parts of the supplement might differ from the article licence.

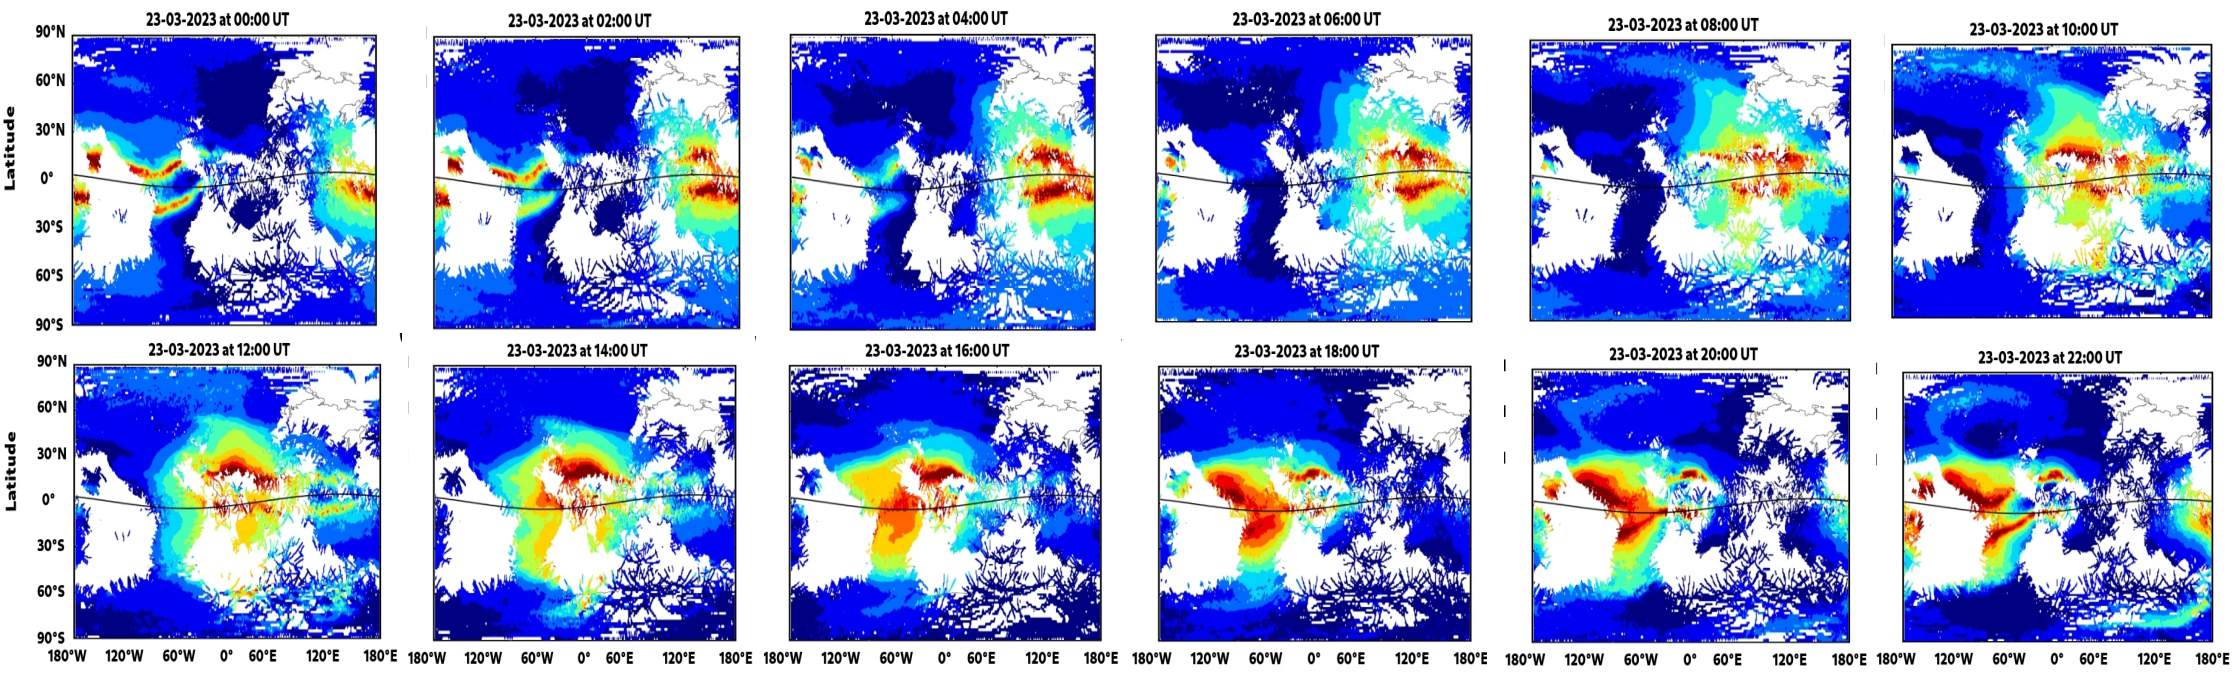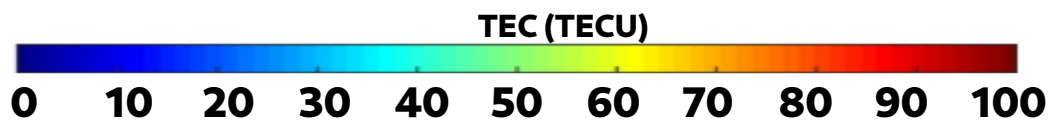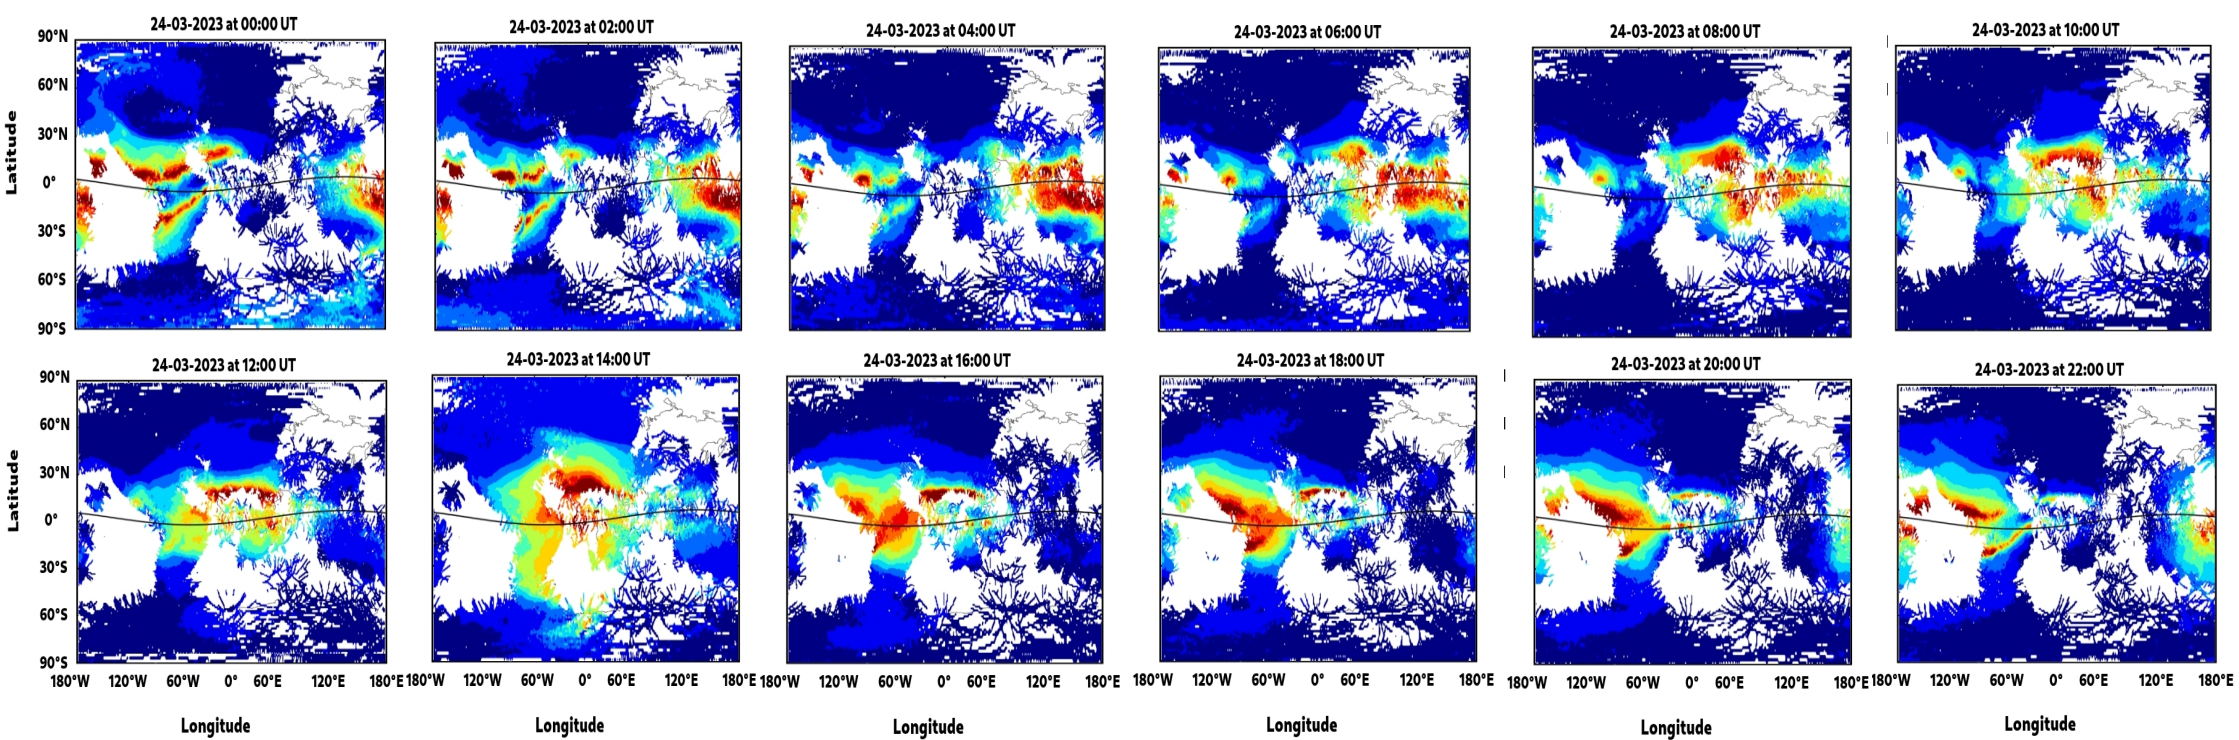

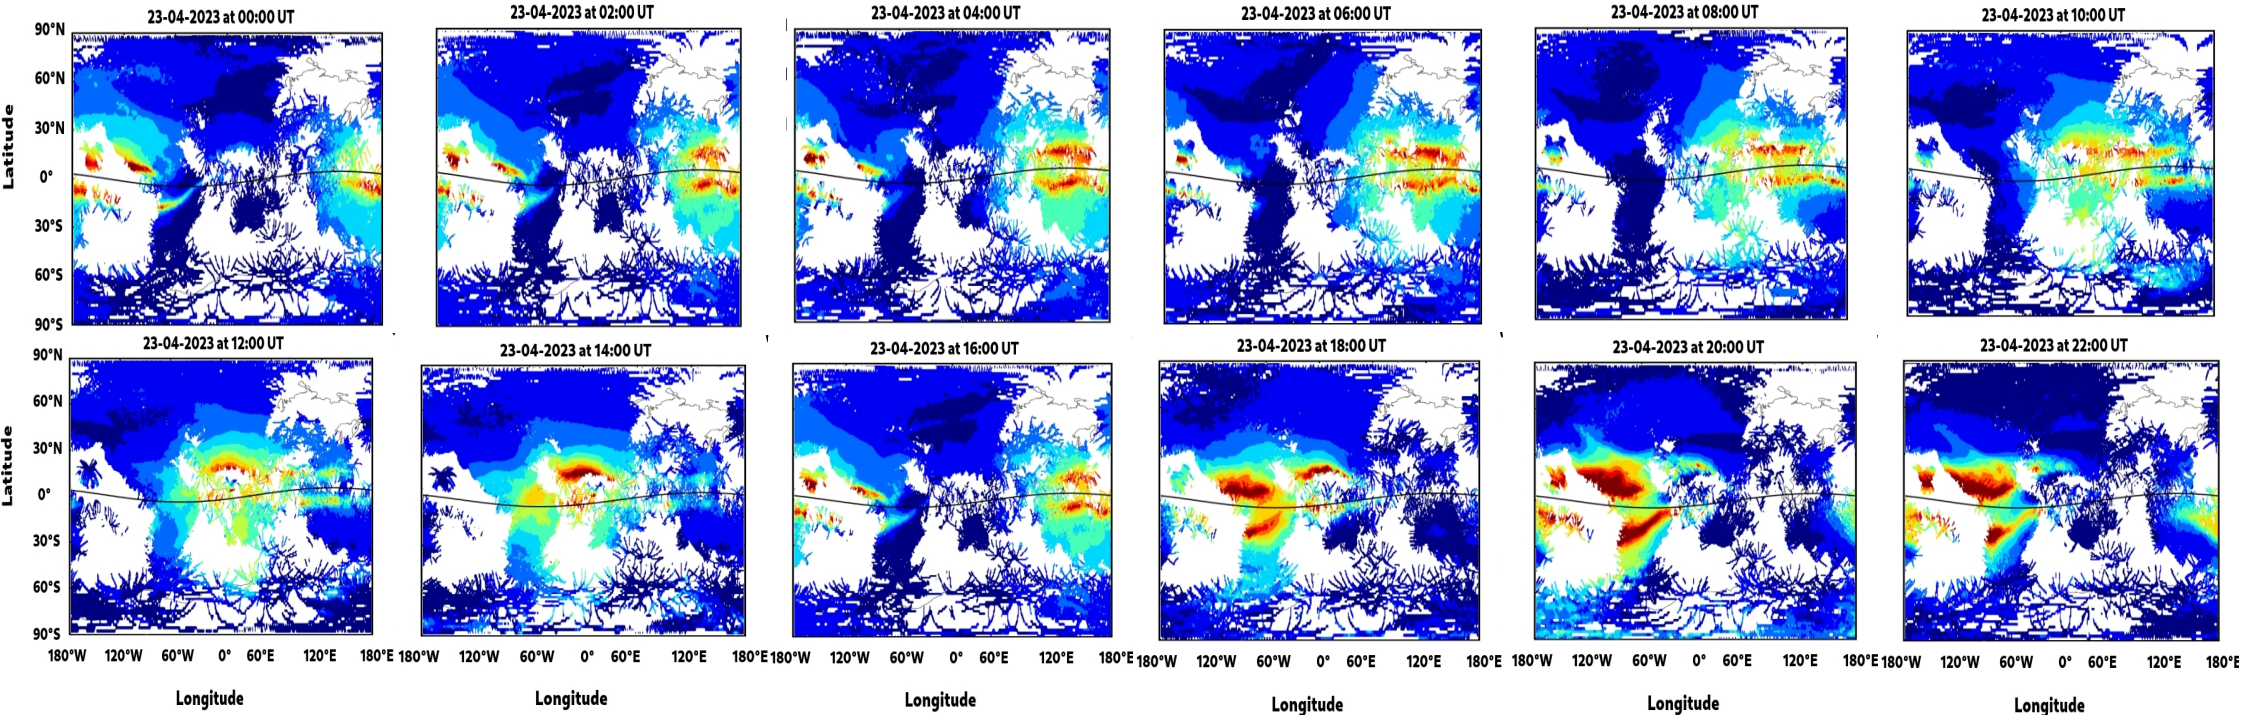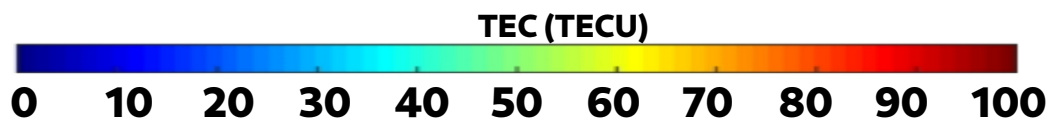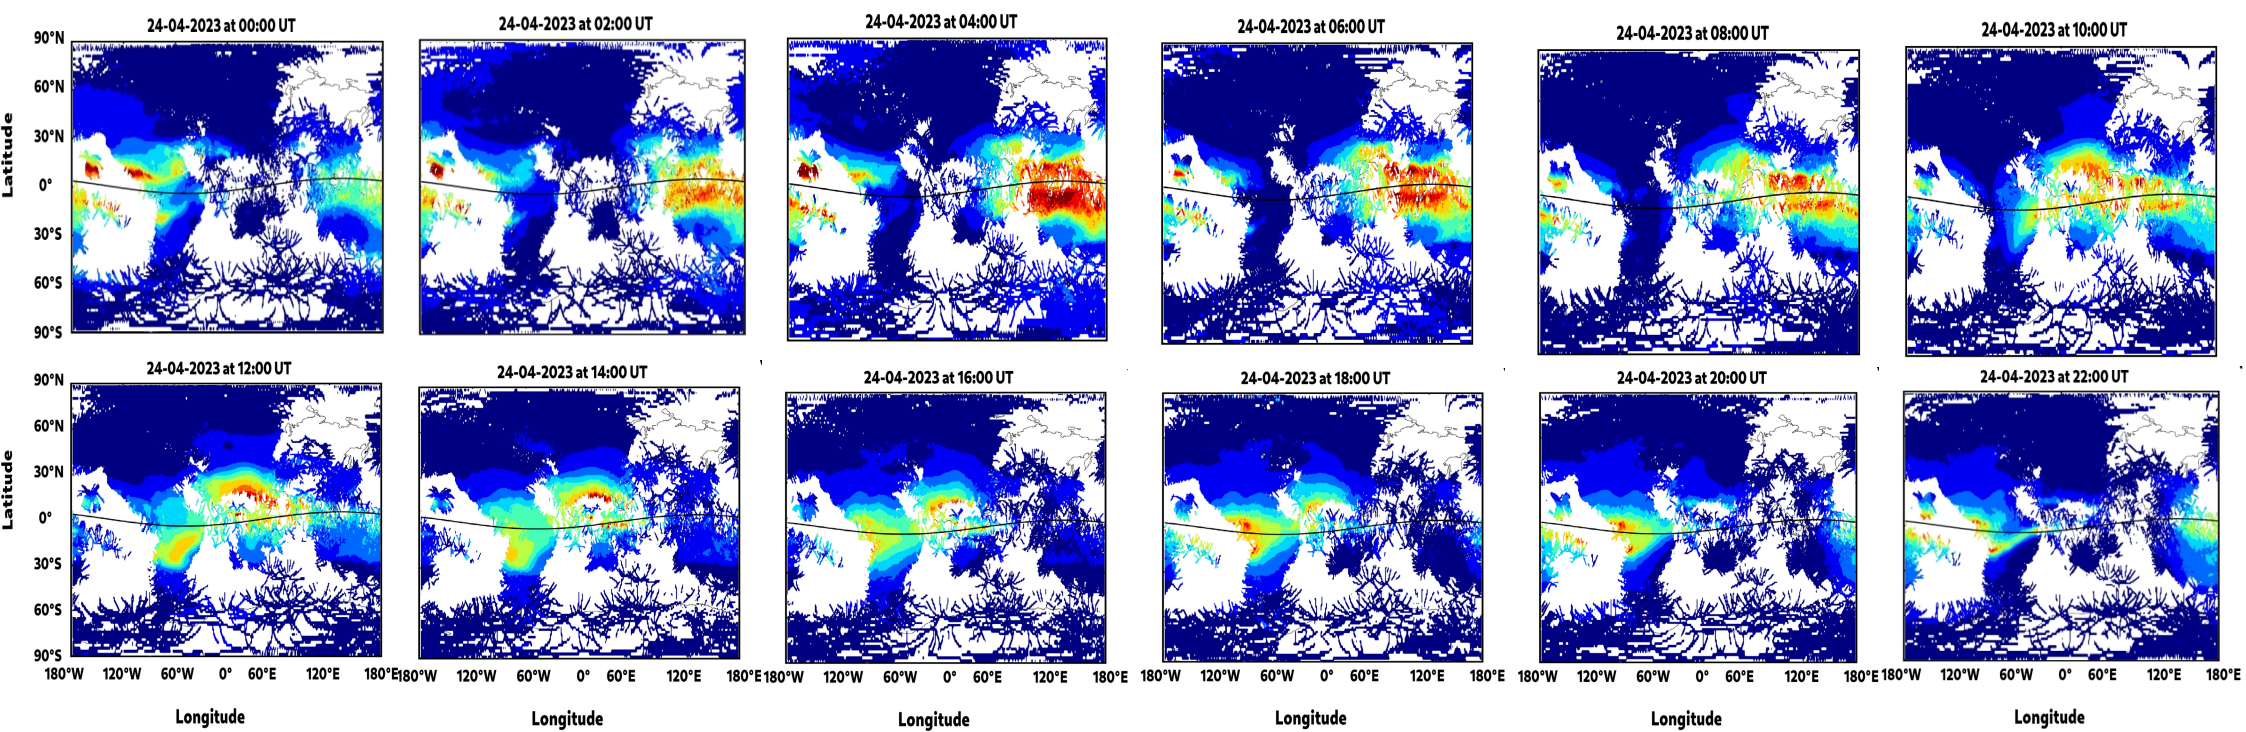

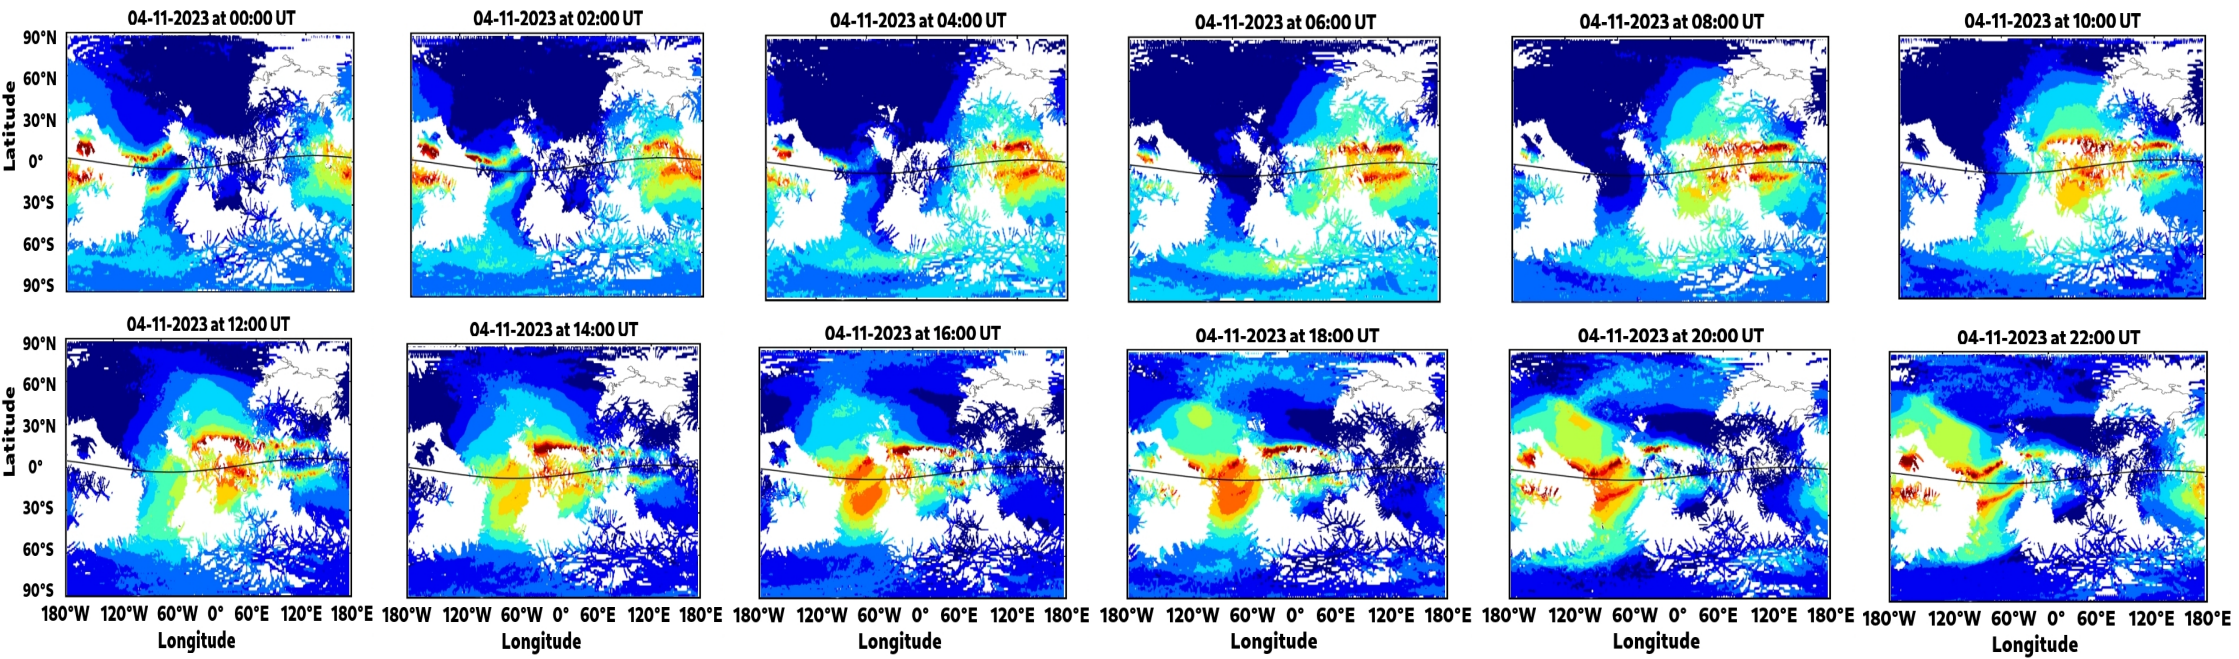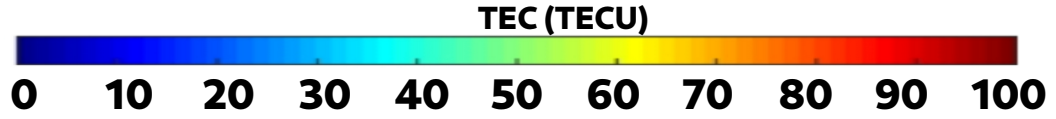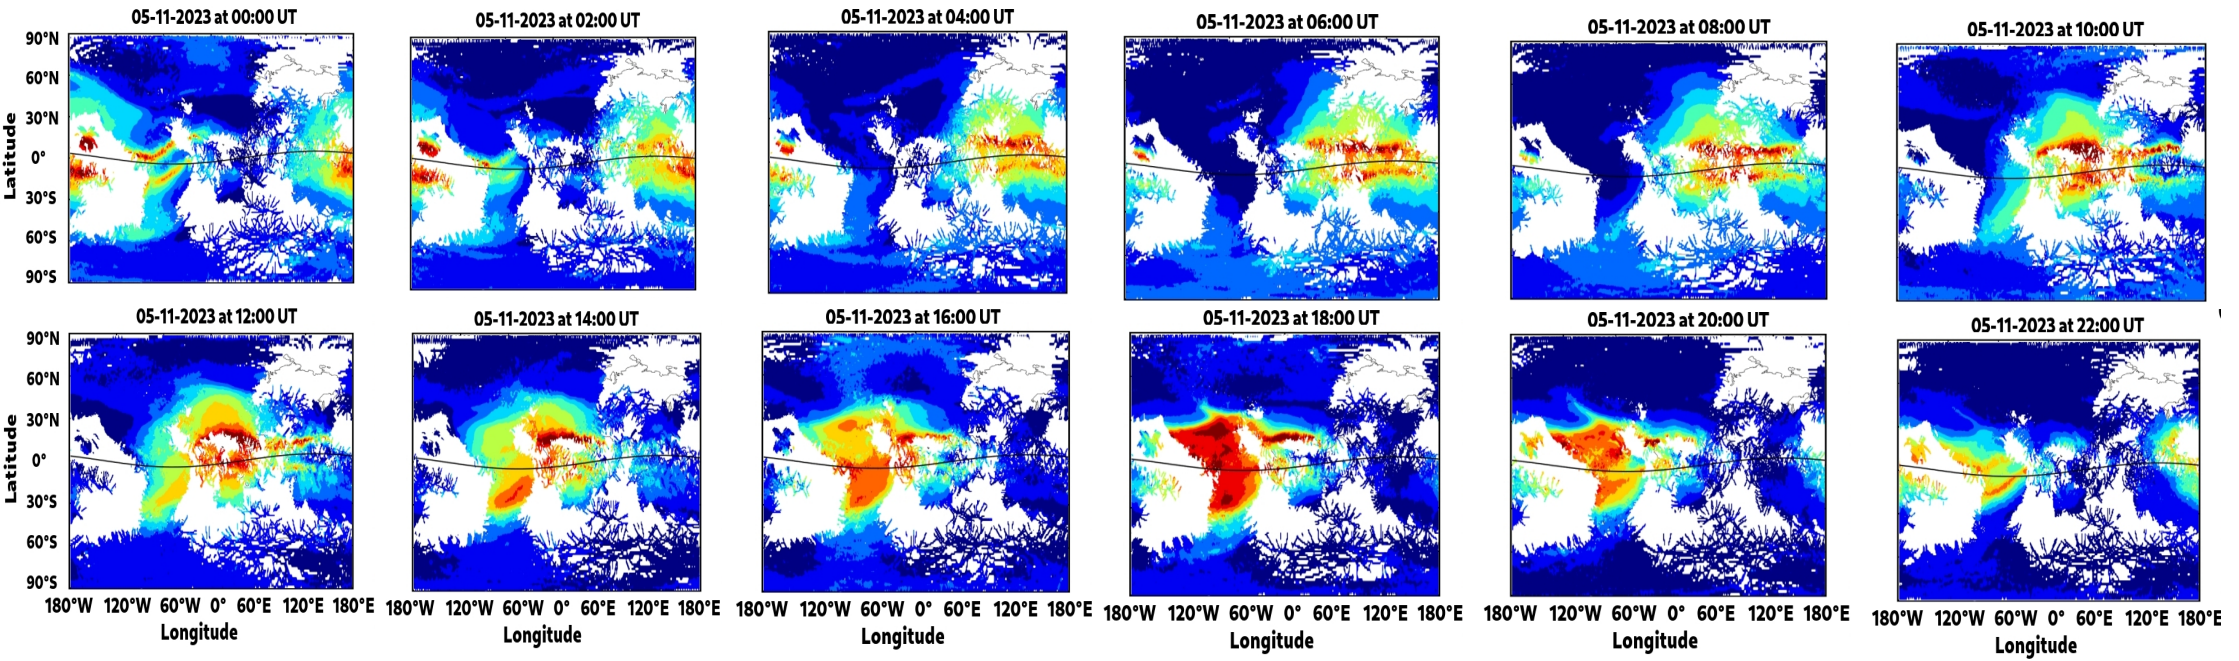

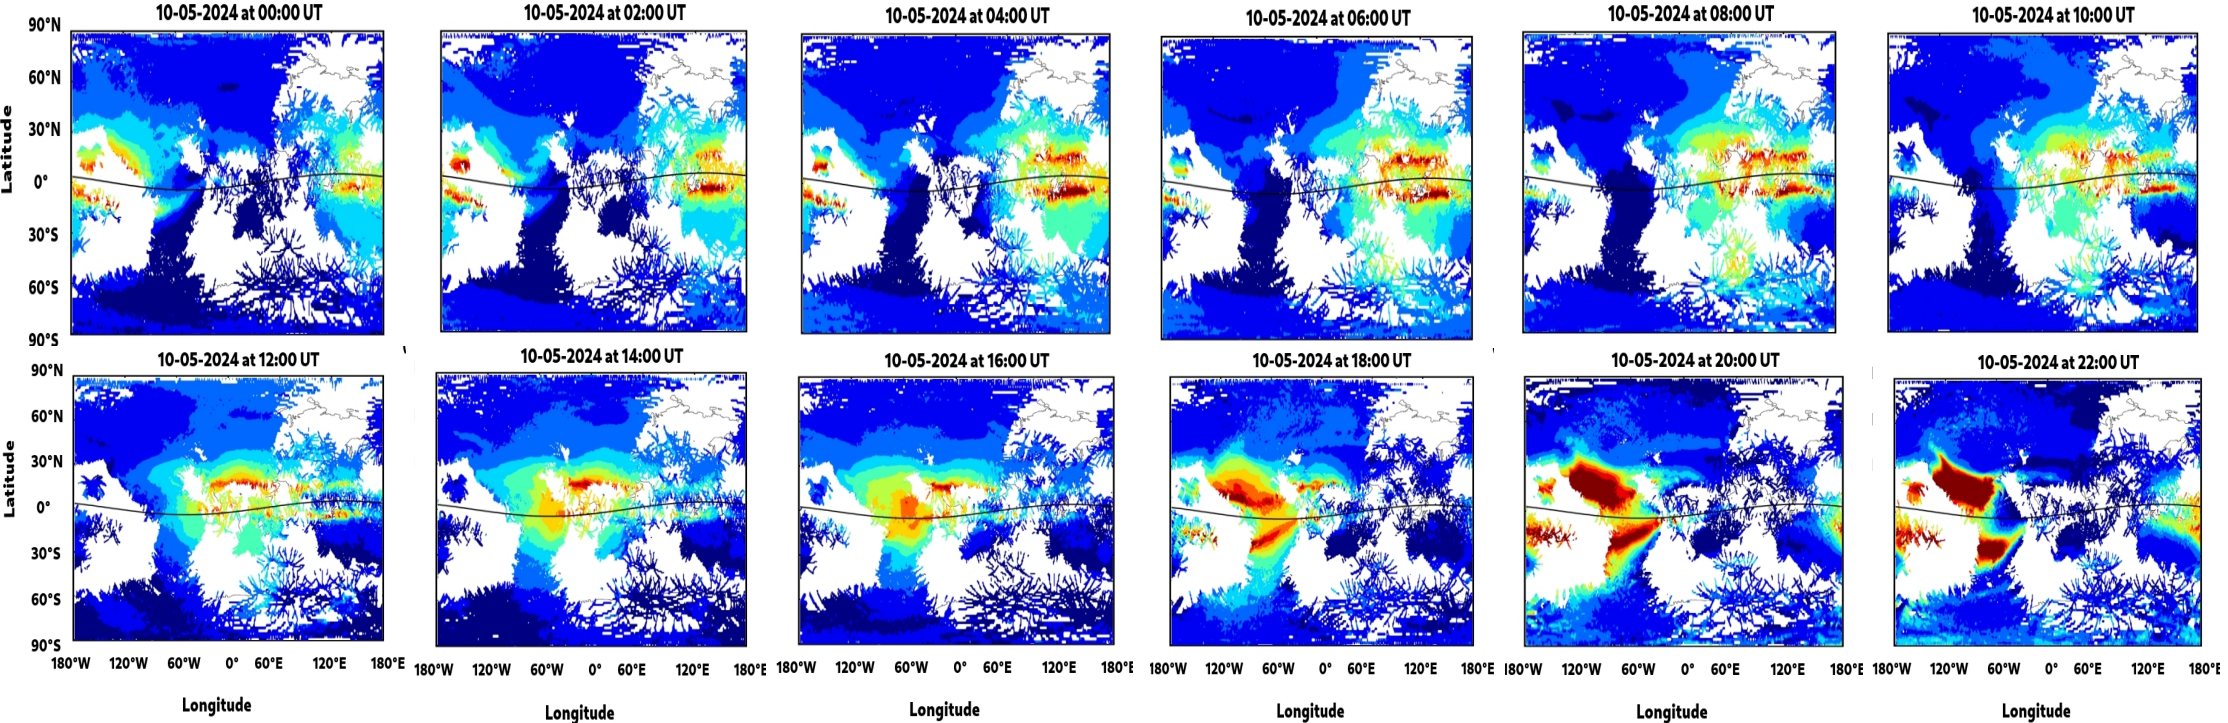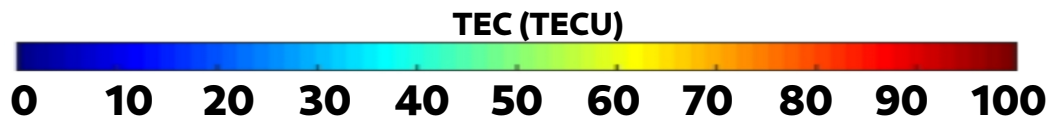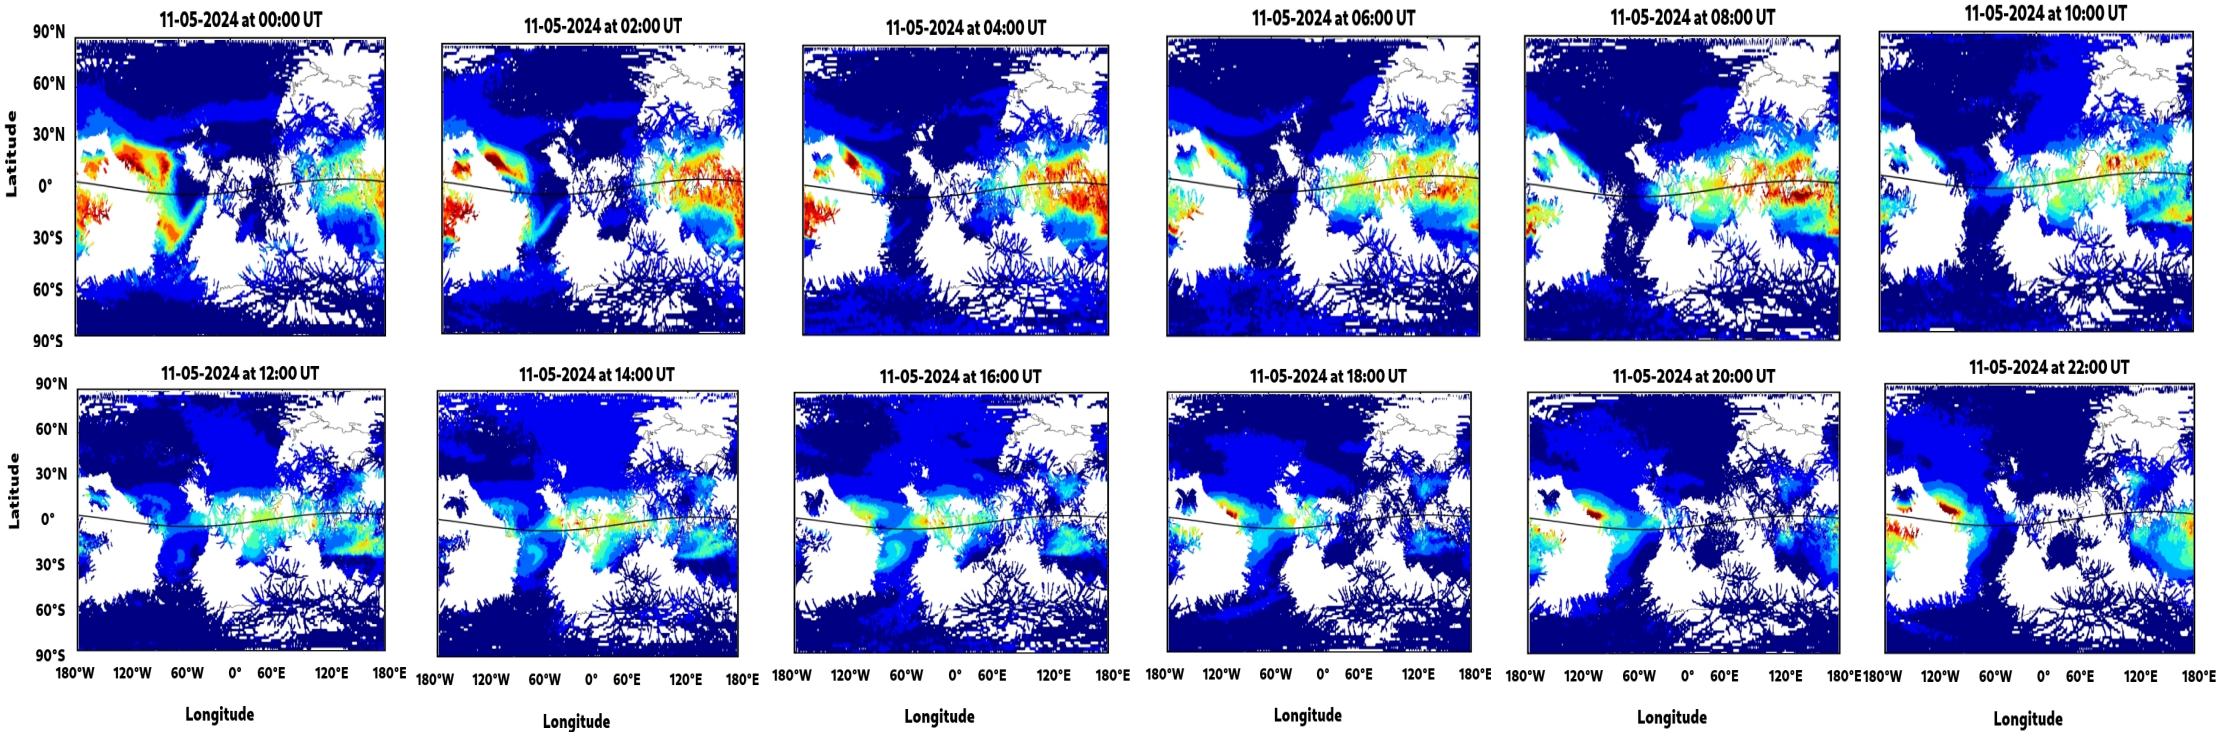

Supplement: Supplementary file 1 [file angeo-44-489-2026-supplement.pdf]
